# Supplementary material for: Joining the crown family; the tetrameric, O-bridged macrocycle [{P(μ-NtBu)}2(μ-O)]4
Source: Royal Society of Chemistry journal article supplement (doi:10.1039/b900268p), 2009-01-01
Supplement: b900268p.pdf [file b900268p.pdf]

## ESI

All of the structures were optimised using Jaguar 7.5 (*Jaguar*, version 7.5; Schrodinger LLC: New York, 2005.) the B3LYP functional [(a) Becke, A. D. *J. Chem. Phys.* **1993**, *98*, 5648–5652. (b) Lee, C. T.; Yang, W. T.; Parr, R. G. *Phys. Rev. B* **1988**, *37*, 785–789] and the 6-31G\*\* basis set. [Hehre, W. J.; Radom, L.; Schleyer, P. v. R.; Pople, J. A. *Ab Initio Molecular Orbital Theory*; Wiley: New York, 1986]. Normal mode analyses showed that all of the structures are minima on the potential energy surface (except for the <sup>t</sup>Bu pentamer, for which attempts to obtain normal mode analysis failed).

**Table 2** Absolute Energies of the Cyclic Oligomers [M]<sub>n</sub> (in a.u.<sup>a</sup> except where stated otherwise)

| Oligomer         |                 | SCF        | U          | H          | G          | ZPE (kcal)* |
|------------------|-----------------|------------|------------|------------|------------|-------------|
| [M] <sub>5</sub> | Me              | -947.23514 | -947.134   | -947.133   | -947.174   | 58.403      |
|                  | <sup>t</sup> Bu | -1183.1432 | -1182.8662 | -1182.8653 | -1182.9246 | 163.785     |
| [M] <sub>4</sub> | Me              | -1894.612  | -1894.41   | -1894.4    | -1894.47   | 118.747     |
|                  | <sup>t</sup> Bu | -2366.4126 | -2365.8542 | -2365.8532 | -2365.9472 | 329.808     |
| [M] <sub>3</sub> | Me              | -2841.9106 | -2841.6    | -2841.6    | -2841.69   | 177.922     |
|                  | <sup>t</sup> Bu | -3549.6151 | -3548.7746 | -3548.7736 | -3548.9048 | 495.195     |
| [M] <sub>2</sub> | Me              | -3789.2283 | -3788.81   | -3788.81   | -3788.93   | 237.163     |
|                  | <sup>t</sup> Bu | -4732.8451 | -4731.7235 | -4731.7225 | -4731.8864 | 661.667     |
| [M] <sub>1</sub> | Me              | -4736.5324 | -4736.01   | -4736.01   | -4736.14   | 296.514     |
|                  | <sup>t</sup> Bu | -5916.0314 | -          | -          | -          | -           |

**a** 1a.u. = 2625.5 kJ mol<sup>-1</sup>; **b** Zero Point Energy.

**Table 3** Relative Thermodynamic Stabilities of Oligomers  $[M]_n$ . Values are for the  $t$ Bu models (where available) are in parenthesis.

| Reaction                    | $\Delta G$ (kJ mol <sup>-1</sup> ) | $\Delta H$ (kJ mol <sup>-1</sup> ) | $\Delta S$ (kJ mol <sup>-1</sup> K <sup>-1</sup> ) |
|-----------------------------|------------------------------------|------------------------------------|----------------------------------------------------|
| $4[M]_5 \rightarrow 5[M]_4$ | -59.1                              | -6.6                               | +0.18                                              |
| $3[M]_5 \rightarrow 5[M]_3$ | -26.3                              | +26.3                              | +0.17                                              |
| $2[M]_5 \rightarrow 5[M]_2$ | -91.9                              | +26.2                              | +0.22                                              |
| $3[M]_4 \rightarrow 4[M]_3$ | +26.3 (+35.0)                      | +26.3 (+64.0)                      | 0 (0.10)                                           |
| $[M]_4 \rightarrow 2[M]_2$  | -26.3 (-21.0)                      | +26.3 (+42.3)                      | +0.18 (+0.21)                                      |
| $2[M]_3 \rightarrow 3[M]_2$ | -39.4 (-28.0)                      | 0 (-16.3)                          | +0.13 (+0.08)                                      |

- Where the data is available, both sets of calculations show the same trends in  $\Delta G$ ,  $\Delta H$  and  $\Delta S$ .
- The first three reactions involving conversion of the pentamer  $[M]_5$  into lower oligomers show a marked dependence on  $\Delta S$ . Only in the case of conversion into the tetramer is  $\Delta H$  -ve (cf the +ve value in the case of conversion into the dimer  $[M]_2$ ).
- The tetramer  $[M]_4$  is thermodynamically stable with respect to the trimer  $[M]_3$ , largely on the basis of  $\Delta H$ . However, it is unstable with respect to the dimer  $[M]_2$  on the grounds of  $\Delta S$ . The trimer is unstable with respect to the dimer on the grounds of  $\Delta H$  and  $\Delta S$ .

*These data suggest that the tetramer represents the most energetically favourable species, but is thermodynamically destabilized with respect to the dimer due to entropy.*
